# Supplementary material
Source: Royal Society of Chemistry journal article supplement (doi:10.1039/d6tc00670a)
Supplement: d6tc00670a1.pdf [file d6tc00670a1.pdf]

## Lattice-Distortion Engineering of Zero-Dimensional Metal Halide Single Crystal for High-Performance Scintillator

Xin Chen<sup>1</sup>, Zehui Xiang<sup>2</sup>, Jian Chen<sup>2</sup>, Fansheng Meng<sup>4</sup>, Yunzhong Zhu<sup>1, \*</sup>, Wei Wang<sup>1, 3, \*</sup>

<sup>1</sup> Sino-French Institute of Nuclear Engineering and Technology, Sun Yat-sen University, Zhuhai 519082, P. R. China

<sup>2</sup> School of Physics and Astronomy, Sun Yat-sen University, Zhuhai 519082, P. R. China

<sup>3</sup> School of Physics, Sun Yat-sen University, Guangzhou, 510275, P. R. China

<sup>4</sup> School of Materials Science and Engineering, Liaocheng University, Liaocheng, P. R. China

\*Corresponding author

zhuyzh7@mail.sysu.edu.cn (Yunzhong Zhu)

wangw223@mail.sysu.edu.cn (Wei Wang)

### Calculation method

The calculation formula for the deformation index D value is as follows:

$$D = \frac{1}{n} \sum_{i=1}^n \left| \frac{l_i - l_{ave}}{l_{ave}} \right| \#(1)$$

Here, n represents the coordination number of the central cation,  $l_i$  is the bond length between each coordinating anion and cation, and  $l_{ave}$  is the average bond length. The calculation formulas for the radiation recombination rate ( $K_r$ ) and the non-radiation recombination rate ( $K_{nr}$ ) are as follows:

$$K_r = \frac{PLQY}{\tau} \#(2)$$

$$K_{nr} = \frac{1 - PLQY}{\tau} \#(3)$$

The improved Arrhenius equation proposed by Shibata is as follows:

$$I(T) = I_0 \frac{1 + A \exp\left(-\frac{E_a}{k_B T}\right)}{1 + B \exp\left(-\frac{E_b}{k_B T}\right)} \#(4)$$

Among them,  $I(T)$  and  $I_0$  represent the PL integral intensities at temperature T and 0 K respectively.  $k_B$  is the Boltzmann constant,  $E_a$  indicates the thermal activation process initiated by the shallow energy level intermediate state, and  $E_b$  corresponds to the activation energy of the non-radiative recombination channel at high temperatures. A and B are the coefficients related to the negative thermal quenching and thermal quenching processes respectively.

### Scintillator

The scintillation detector system is mainly composed of Hamamatsu R6231-100 photomultiplier tube (PMT), SHR high-voltage power supply, custom pre-amplifier circuit board, CAKE611 shaping amplifier, RIGOL DP831A DC power supply, and Pico Scope 5000 data acquisition system. Before the test, the single crystal is wrapped with polytetrafluoroethylene tape to reduce light scattering, and only the light-emitting surface is retained to obtain the encapsulated scintillation body. Then, an appropriate amount of optical silicone oil is applied to the photomultiplier tube window to achieve optical coupling with the scintillation body. The negative high voltage used in the test is 900V. All data are processed using MATLAB R2024a software. After performing Gaussian fitting on the universal peak, the energy resolution is calculated using the ratio of full width at full width at half maximum (FWHM) to the corresponding channel number.

The relative light output of the scintillator was calibrated using the standard commercial scintillator NaI. The calculation formula is as follows:

$$LY_{Sample} = \frac{H_{sample} \cdot \beta_{Sample}}{H_{NaI} \cdot \beta_{NaI}} LY_{NaI} \# (5)$$

Where LY, H,  $\beta$  is the light yield, channel number and external quantum efficiency, respectively.

The relationship between the energy resolution of the scintillator and the gamma-ray energy can be fitted using the following empirical formula:

$$ER = \left( a + \frac{b}{\sqrt{E_\gamma}} \right) \# (6)$$

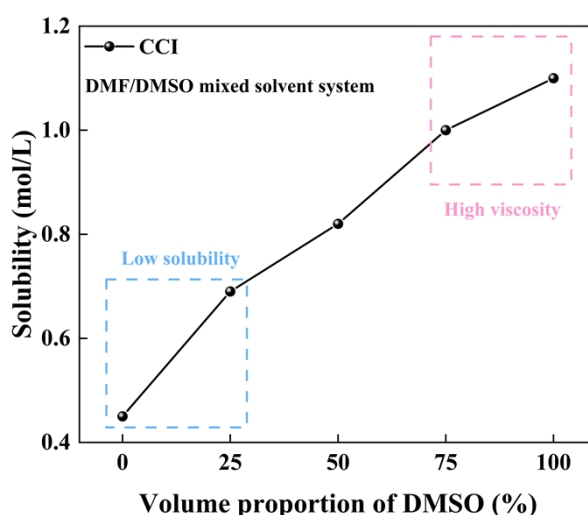

**Figure S1.** CCI precursor solubility curves under different volume proportion of DMSO.

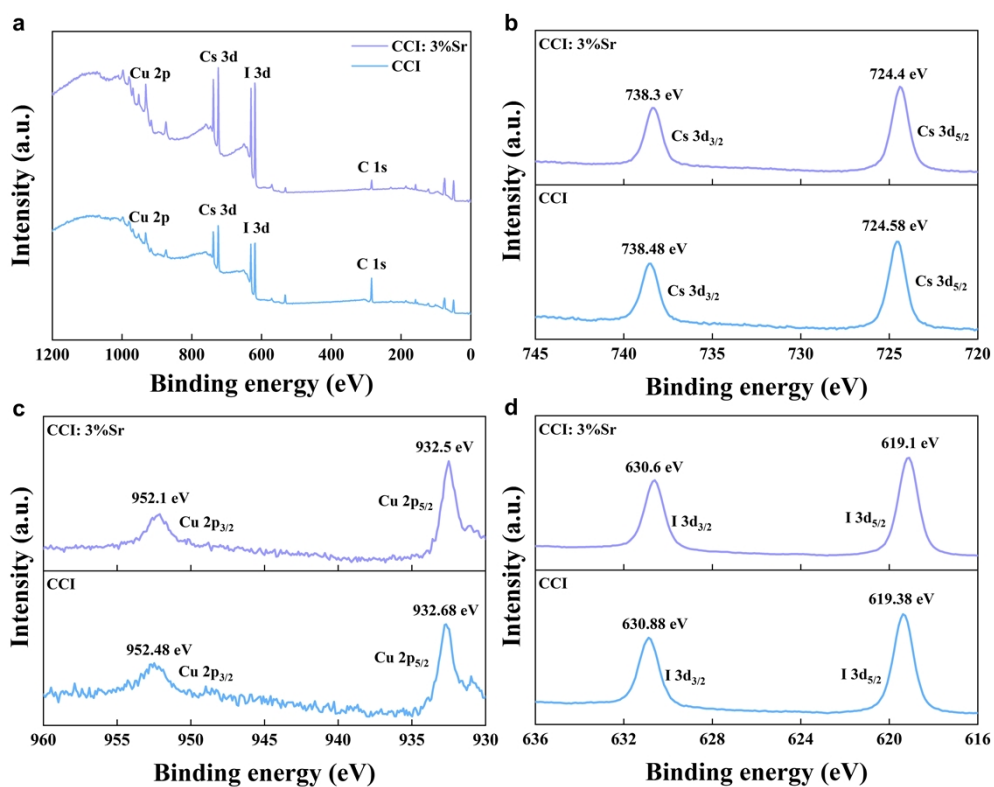

**Figure S2.** (a) XPS full spectra of CCI and CCI: 3%Sr single crystals. (b-d) XPS spectra of Cs 3d, Cu 2p, and I 3d in CCI and CCI: 3%Sr.

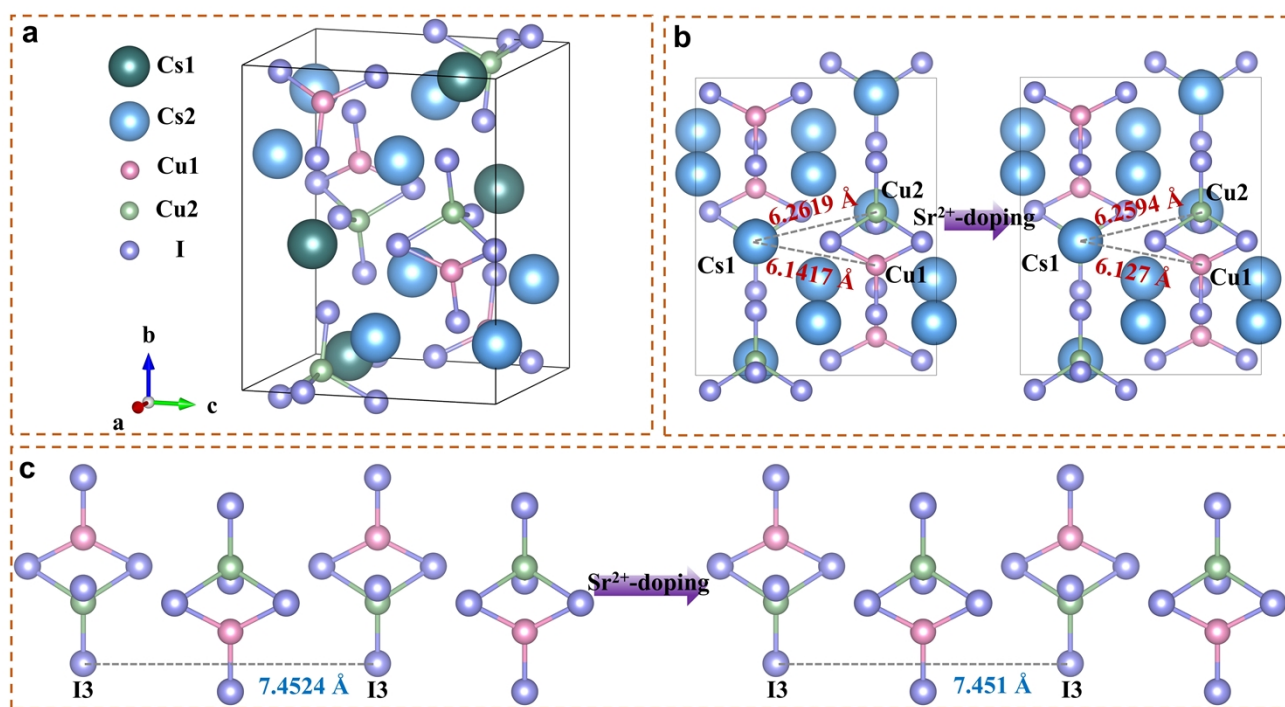

**Figure S3.** (a) Crystal structure model of CCI. (b) Comparison of Cs1-Cu1/Cu2 distances after 3%  $\text{Sr}^{2+}$  doping. (c) Comparison of I3-I3 distances between adjacent unit cells.

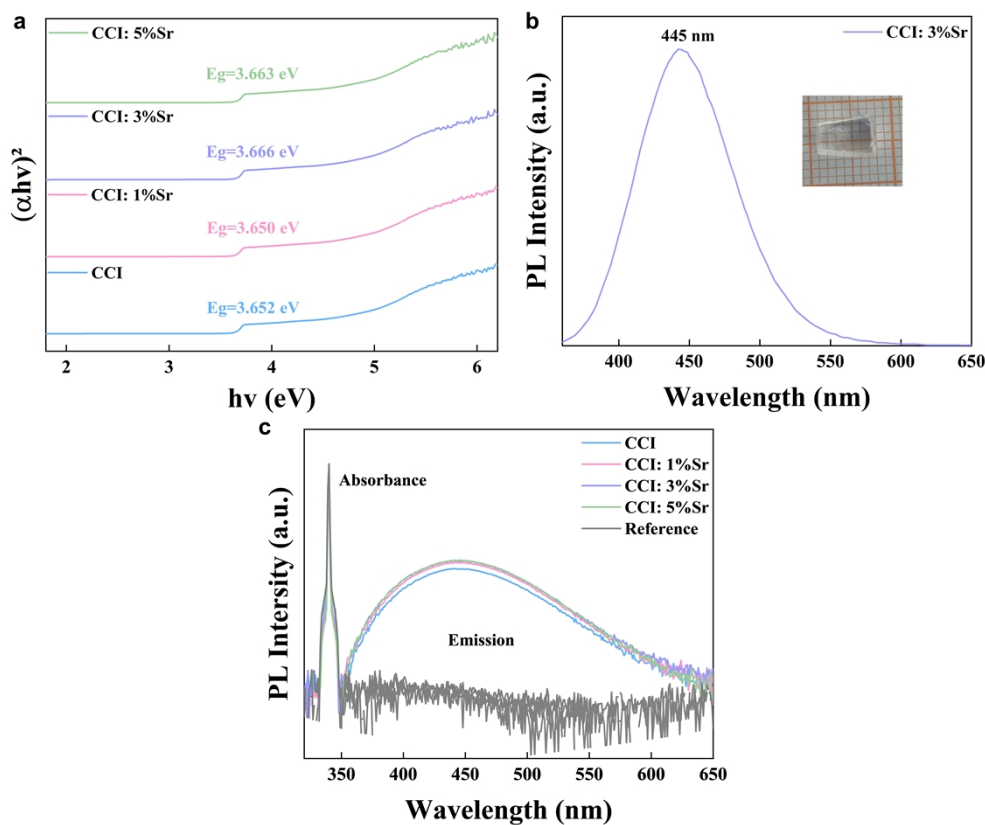

**Figure S4.** (a) Tauc curve of CCI: x%Sr single crystals. (b) The photograph of CCI: 3%Sr single crystal after grinding and polishing treatment and corresponding PL spectra. (c) PLQY measurement results of CCI: x%Sr single crystals.

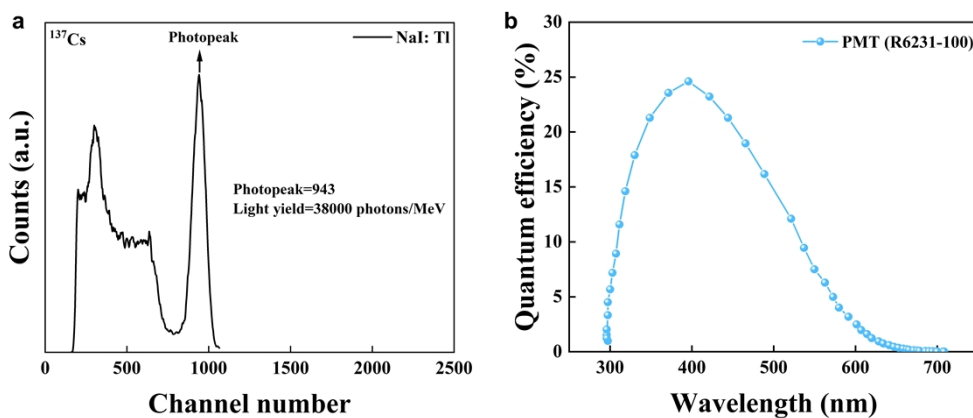

**Figure S5.** (a) The pulse height spectrum of the NaI: Tl scintillator under the  $^{137}\text{Cs}$  radiation source. (b) The external quantum efficiency curve of the photomultiplier tube (R6231-100).

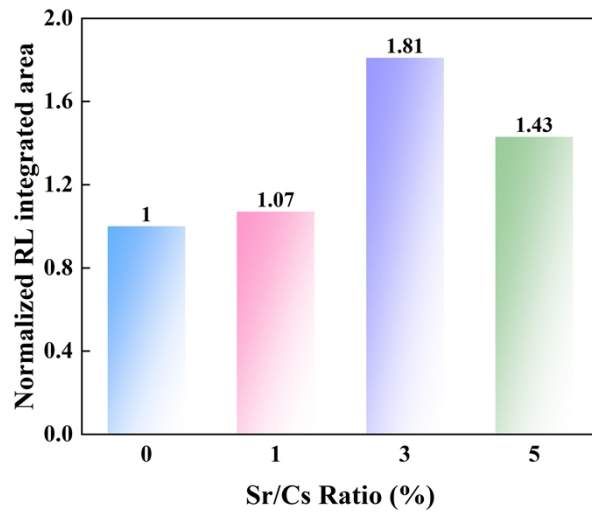

Figure S6. Normalized RL integrated area of CCI: x%Sr single crystals.

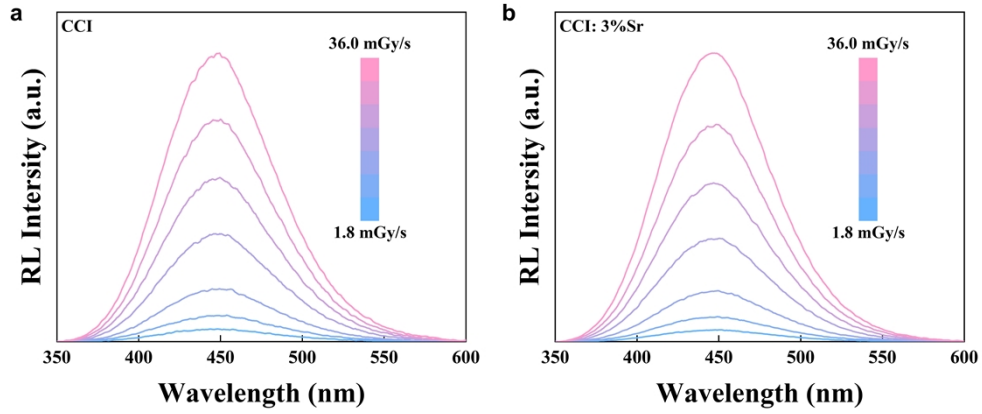

Figure S7. RL spectra of (a) CCI and (b) CCI: 3%Sr single crystals under different X-ray dose rates.

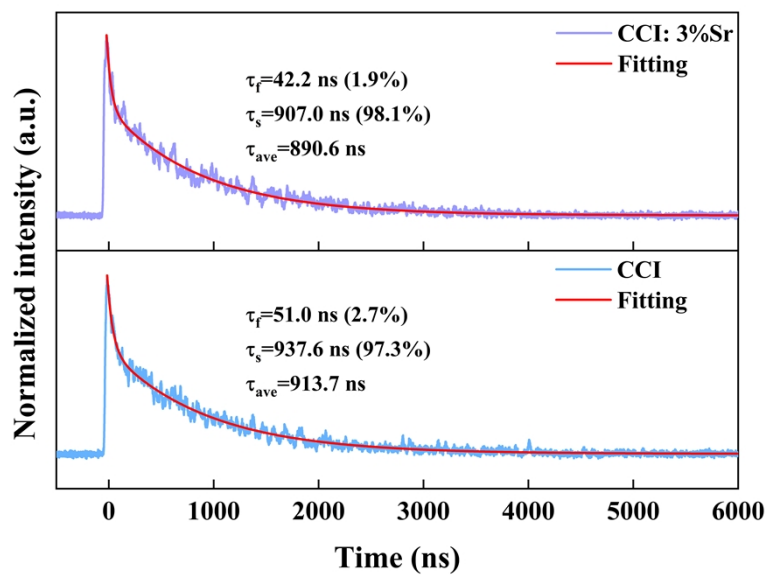

Figure S8. The scintillation decay curves of pure CCI and CCI: 3%Sr single crystals under  $^{137}\text{Cs}$  radiation source.

**Table S1.** Crystal structure data for pure CCI and CCI: 3%Sr crystals.

| Empirical formula                  | CCI          | CCI: 3%Sr    |
|------------------------------------|--------------|--------------|
| Formula weight/g·mol <sup>-1</sup> | 1160.31      | 1160.31      |
| Crystal system                     | orthorhombic | orthorhombic |
| Space group                        | Pnma         | Pnma         |
| a/Å                                | 10.1000(3)   | 10.1027(2)   |
| b/Å                                | 11.5824(3)   | 11.5773(3)   |
| c/Å                                | 14.2881(3)   | 14.2861(4)   |
| $\alpha/^\circ$                    | 90           | 90           |
| $\beta/^\circ$                     | 90           | 90           |
| $\gamma/^\circ$                    | 90           | 90           |
| Volume/Å <sup>3</sup>              | 1671.45(7)   | 1670.93(7)   |
| Z                                  | 4            | 4            |
| Density/g·cm <sup>-3</sup>         | 4.611        | 4.612        |
| M/mm <sup>-1</sup>                 | 18.176       | 18.181       |
| F(000)                             | 1952         | 1952         |

**Table S2.** Calculated recombination rate of radiation and non-radiation.

| CCI: x%Sr | PLQY (%) | $\tau$ (ns) | Kr ( $\times 10^{-5}$ s <sup>-1</sup> ) | Knr ( $\times 10^{-5}$ s <sup>-1</sup> ) |
|-----------|----------|-------------|-----------------------------------------|------------------------------------------|
| 0         | 76.74    | 1005.2      | 7.6343                                  | 2.3139                                   |
| 1         | 79.48    | 940.4       | 8.4517                                  | 2.1821                                   |
| 3         | 83.81    | 982.9       | 8.5268                                  | 1.6472                                   |
| 5         | 81.68    | 991.5       | 8.2380                                  | 1.8477                                   |

**Table S3.** Detailed parameters of energy resolution calculation.

| Materials | Source Energy (keV) | W           | Xc   | FWHM( $=\sqrt{\ln 4}W \approx 1.1774W$ ) | Energy resolution (%) |
|-----------|---------------------|-------------|------|------------------------------------------|-----------------------|
| CCI       | 662                 | 51.07±3.51  | 953  | 60.13±4.13                               | 6.31±0.43             |
| CCI: 1%Sr | 662                 | 48.93±3.44  | 1026 | 57.61±4.05                               | 5.62±0.39             |
| CCI: 3%Sr | 662                 | 45.71±2.73  | 1083 | 53.82±3.21                               | 4.97±0.30             |
| CCI: 5%Sr | 662                 | 53.82±4.53  | 1052 | 63.37±5.33                               | 6.02±0.50             |
| CCI       | 511                 | 41.59±4.87  | 725  | 48.97±5.73                               | 6.75±0.79             |
| CCI: 3%Sr | 511                 | 38.98±2.02  | 828  | 45.90±2.38                               | 5.54±0.29             |
| CCI       | 1275                | 72.74±14.82 | 1756 | 85.64±17.45                              | 4.88±0.99             |
| CCI: 3%Sr | 1275                | 60.13±6.41  | 2012 | 70.80±7.55                               | 3.52±0.38             |
| CCI       | 356                 | 32.65±2.56  | 507  | 38.44±3.01                               | 7.58±0.59             |
| CCI: 3%Sr | 356                 | 31.28±2.61  | 577  | 36.83±3.07                               | 6.38±0.53             |
| CCI       | 344                 | 33.14±4.93  | 487  | 39.02±5.80                               | 8.01±1.19             |
| CCI: 3%Sr | 344                 | 30.73±3.13  | 553  | 36.18±3.69                               | 6.54±0.67             |
| CCI       | 244                 | 27.62±6.65  | 352  | 32.52±7.83                               | 9.24±2.22             |
| CCI: 3%Sr | 244                 | 25.12±3.51  | 399  | 29.58±4.13                               | 7.41±1.04             |
| CCI       | 122                 | 17.03±0.56  | 189  | 20.05±0.66                               | 10.61±0.35            |
| CCI: 3%Sr | 122                 | 16.60±0.54  | 213  | 19.54±0.64                               | 9.17±0.30             |
| CCI       | 59.5                | 13.03±0.22  | 101  | 15.34±0.26                               | 15.19±0.26            |
| CCI: 3%Sr | 59.5                | 12.86±0.22  | 112  | 15.14±0.26                               | 13.52±0.23            |

**Table S4.** Light yield calculation parameters.

| Materials | Wavelength (nm) | EQE (%) (R6231-100) | Channel number | Light yield (photons/MeV) |
|-----------|-----------------|---------------------|----------------|---------------------------|
| NaI: Tl   | 415             | 23.57               | 943            | 38000                     |

|                  |     |       |      |       |
|------------------|-----|-------|------|-------|
| <b>CCI</b>       | 448 | 20.88 | 953  | 43400 |
| <b>CCI: 1%Sr</b> | 448 | 20.88 | 1026 | 46700 |
| <b>CCI: 3%Sr</b> | 448 | 20.88 | 1083 | 49300 |
| <b>CCI: 5%Sr</b> | 448 | 20.88 | 1052 | 47900 |

**Table S5.** Performance comparison of CCI series single-crystal scintillators.

| <b>Materials</b>                                        | <b>Growth Method</b> | <b>Preprocess</b> | <b>Wavelength (nm)</b> | <b><sup>137</sup>Cs Energy resolution (%)</b> | <b>Light yield (photons/Mev)</b> | <b>Ref.</b> |
|---------------------------------------------------------|----------------------|-------------------|------------------------|-----------------------------------------------|----------------------------------|-------------|
| <b>CsCu<sub>2</sub>I<sub>3</sub></b>                    | Solution             | No need           | 576                    | 11.6                                          | 20000                            | 1           |
| <b>CsCu<sub>2</sub>I<sub>3</sub></b>                    | Bridgman             | Cut and polish    | 575                    | 10.5                                          | 10248                            | 2           |
| <b>CsCu<sub>2</sub>I<sub>3</sub>: 5%Li</b>              |                      |                   | 575                    | 6.8                                           | 10900                            |             |
| <b>CsCu<sub>2</sub>I<sub>3</sub>: 3%Na</b>              | Bridgman             | Cut and polish    | 575                    | 9.3                                           | 9376                             | 3           |
| <b>Cs<sub>3</sub>Cu<sub>2</sub>I<sub>5</sub></b>        | Bridgman             | Cut and polish    | 445                    | 7.19                                          | 24000                            | 4           |
| <b>Cs<sub>3</sub>Cu<sub>2</sub>I<sub>5</sub>: 1%Li</b>  |                      |                   | 445                    | 5.25                                          | 28000                            |             |
| <b>Cs<sub>3</sub>Cu<sub>2</sub>I<sub>5</sub>: 0.5Tl</b> | Bridgman             | Cut and polish    | 505                    | 4.8                                           | 83000                            | 5           |
| <b>Cs<sub>3</sub>Cu<sub>2</sub>I<sub>5</sub></b>        | Solution             | Cut and polish    | 444                    | 5.6                                           | 38000                            | 6           |
| <b>Cs<sub>3</sub>Cu<sub>2</sub>I<sub>5</sub></b>        | Bridgman             | Cut and polish    | 452                    | 7.7                                           | 18000                            | 7           |
| <b>Cs<sub>3</sub>Cu<sub>2</sub>I<sub>5</sub>: 1%Tl</b>  |                      |                   | 517                    | 4.5                                           | 51000                            |             |
| <b>Cs<sub>3</sub>Cu<sub>2</sub>I<sub>5</sub></b>        | Solution             | Polish            | 445                    | 6.89                                          | 31418                            | 8           |
| <b>Cs<sub>3</sub>Cu<sub>2</sub>I<sub>5</sub>: 5%Na</b>  |                      |                   | 445                    | 5.37                                          | 34707                            |             |
| <b>CCI</b>                                              | Solution             | No need           | 448                    | 6.31                                          | 43350                            | This work   |
| <b>CCI: 3%Sr</b>                                        |                      |                   | 448                    | 4.97                                          | 49264                            |             |

## References

1. B. Bansal, V. Anand, N. K. Tailor, V. Ranga, S. Satapathi, P. J. Sellin, M. Tyagi and G. Anil Kumar, *IEEE Transactions on Nuclear Science*, 2025, **72**, 3169-3177.
2. D. Liu, Q. Wei, Y. Tong, P. Xiang, P. Cai, G. Tang, H. Shi and L. Qin, *CrystEngComm*, 2023, **25**, 58-63.
3. C. Shu, Q. Wei, D. Liu, W. Li, H. Yin, H. Li, G. Tang and L. Qin, *Crystals*, 2023, **13**, 1157.
4. P. Xiang, Q. Wei, C. Wang, P. Cai, Y. Tong, G. Tang, X. Sun, F. Yang, H. Shi, Z. Liu and L. Qin, *Journal of Materials Chemistry C*, 2022, **10**, 15400-15407.
5. R. Zheng, L. Wang, Y. Liu, J. Chen, P. Xiao and Q. Xie, *Journal of Crystal Growth*, 2024, **627**, 127512.
6. Y. Li, H. Shen, Y. Li, Y. Gu, J. Zhao, L. Li and J. Xu, *Ceramics International*, 2024, **50**, 32603-32612.
7. D. Yuan, *ACS Applied Materials & Interfaces*, 2020, **12**, 38333-38340.
8. Y. Lei, L. Xu, Y. Wang, L. Lian, C. Liu, Y. Wang, L. Liang, Z. Qin, S. Han, W. Zheng, Q. Hu, X. Liu, T. Wang and W. Jie, *Journal of Materials Chemistry A*, 2025, **13**, 22660-22671.
